# Supplementary material for: Acid-enhanced ternary DES pretreatment of wheat straw guided by Kamlet–Taft parameters: boosting lignin separation and enzymatic hydrolysis
Source: Royal Society of Chemistry journal article supplement (doi:10.1039/d5ra05909g), 2025-01-01
Supplement: d5ra05909g1.pdf [file d5ra05909g1.pdf]

## **Support information**

### **Acid-enhanced ternary DES pretreatment of wheat straw guided by Kamlet-Taft parameters: Boosting lignin separation and enzymatic hydrolysis**

Jing-yuan SU, Yan-xia AN<sup>\*</sup>, Lin-lin Li, Jia-zi ,WANG, Yi HAN, Jian ZHANG, Yang ZHAO

(College of Food Science and Technology, Henan Agricultural University, Zhengzhou 450002, Henan, China)

## **Figure**

Fig. S1. Surface morphology of wheat straw before and after pretreatment.

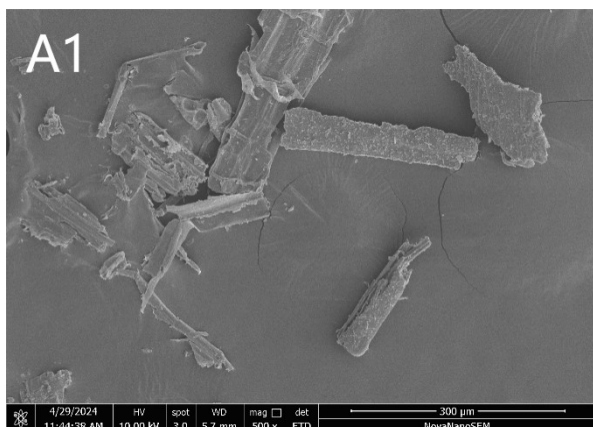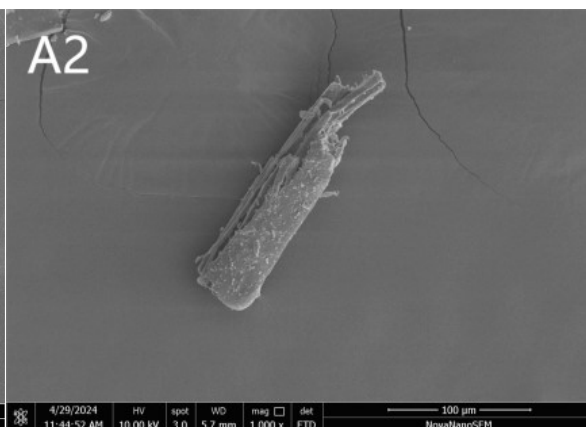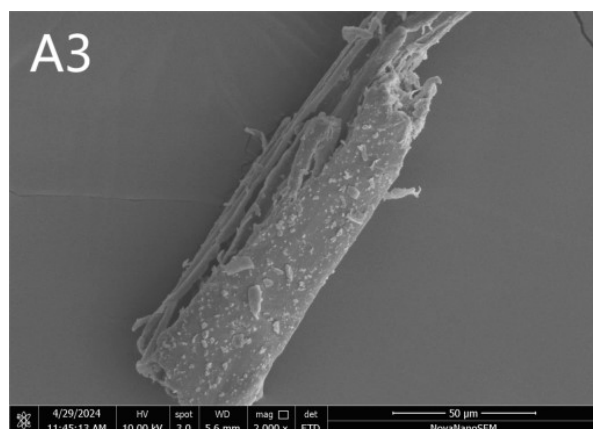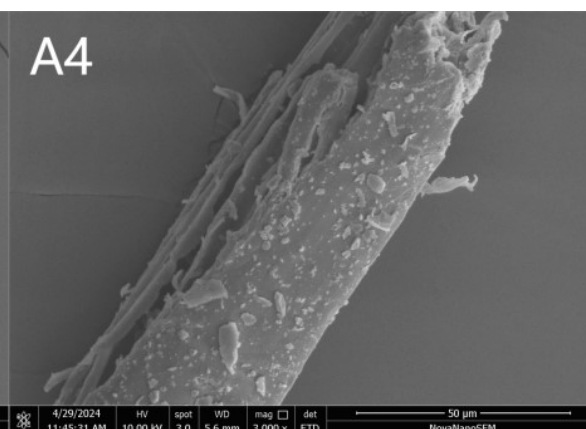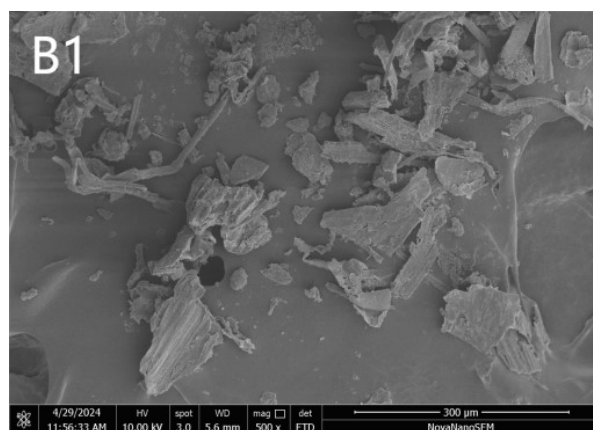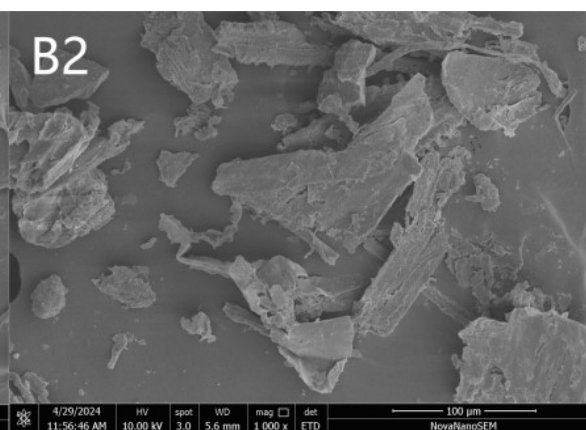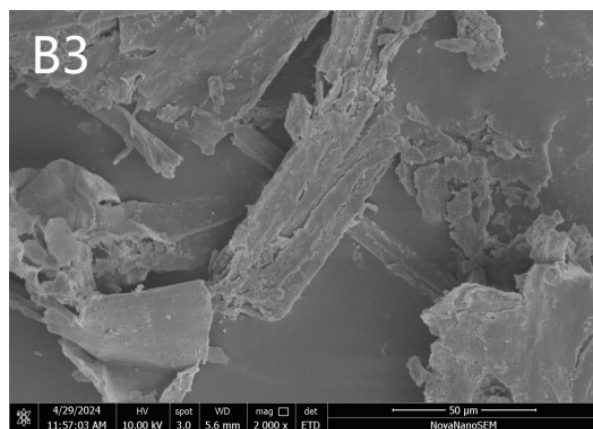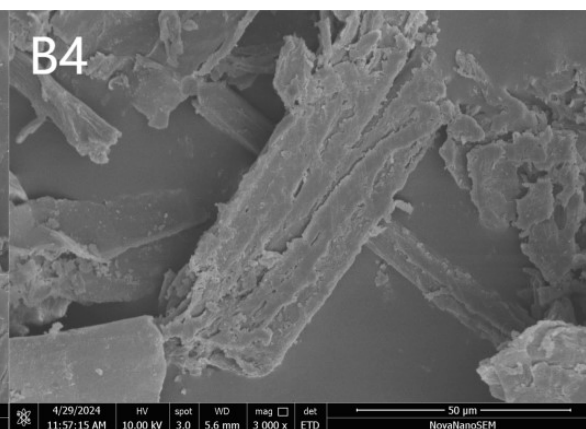

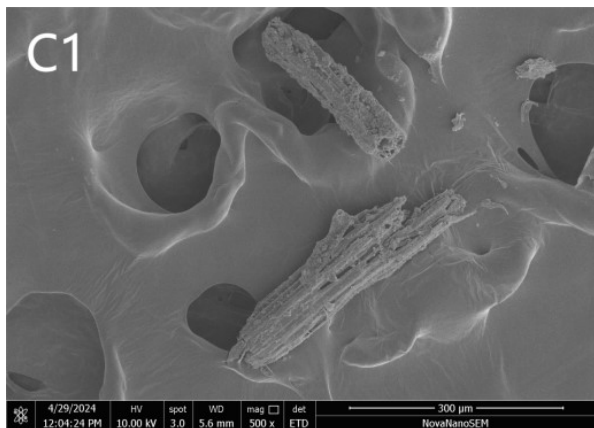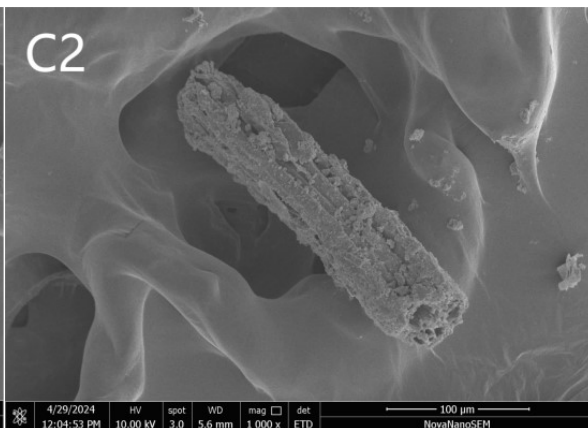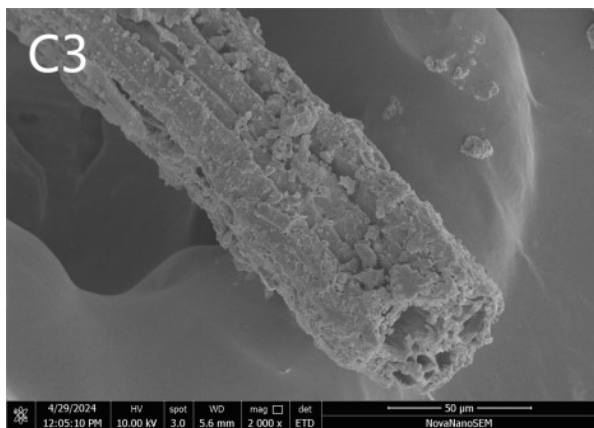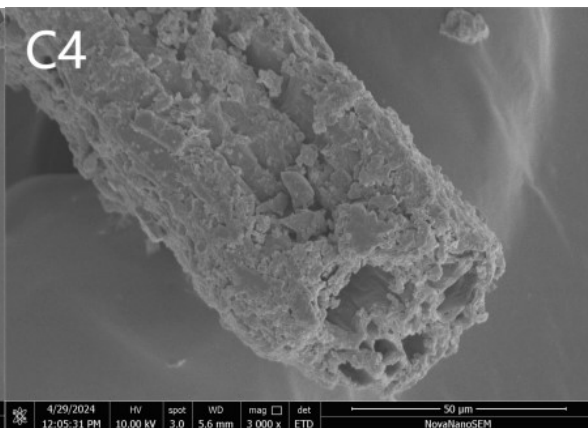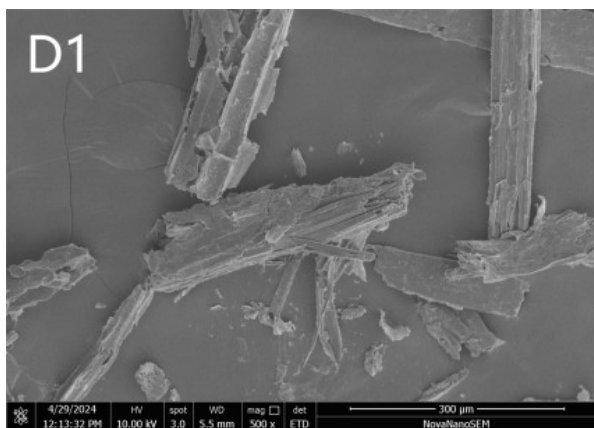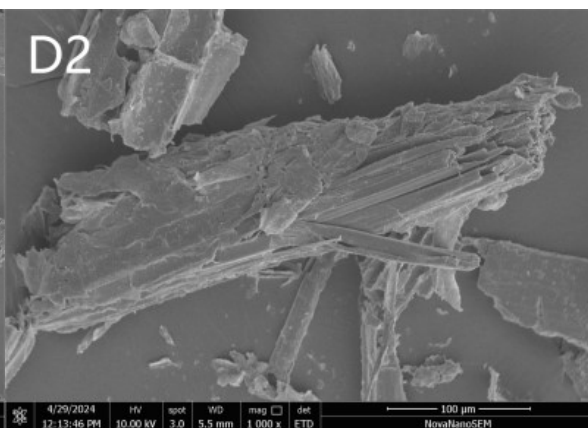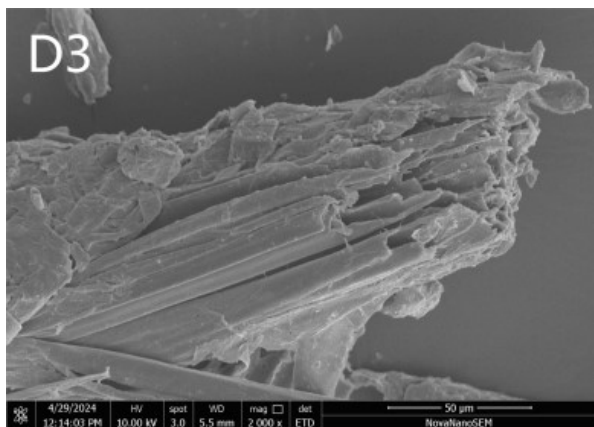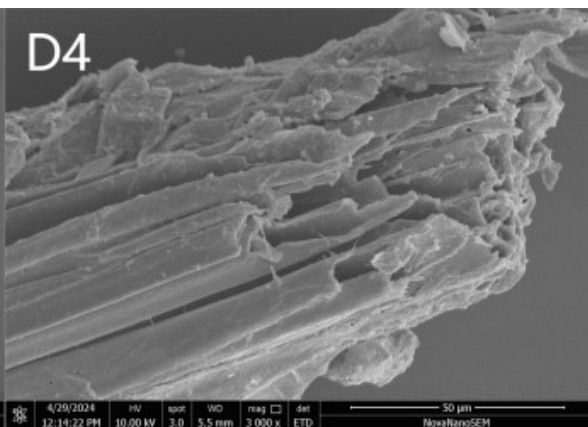

A: Untreated wheat straw B:  $\text{CHCl}_3/\text{BDO}/\text{AlCl}_3$  C:  $\text{CHCl}_3/\text{EG}/\text{PTA}$  D:  $\text{CHCl}_3/\text{GI}/\text{FeBr}_3$

Fig. S1. Surface morphology of wheat straw before and after pretreatment.
